# Supplementary material
Source: HighWire-hosted journal article supplement (https://www.cmaj.ca/highwire/filestream/58315/field_highwire_adjunct_files/1/image-ruan-2-at.pdf)

Appendix 2: Contrast-enhanced computed tomographic image of the chest showing a feeding artery (white arrow) from the aorta and venous return (black arrow) to the azygos vein.

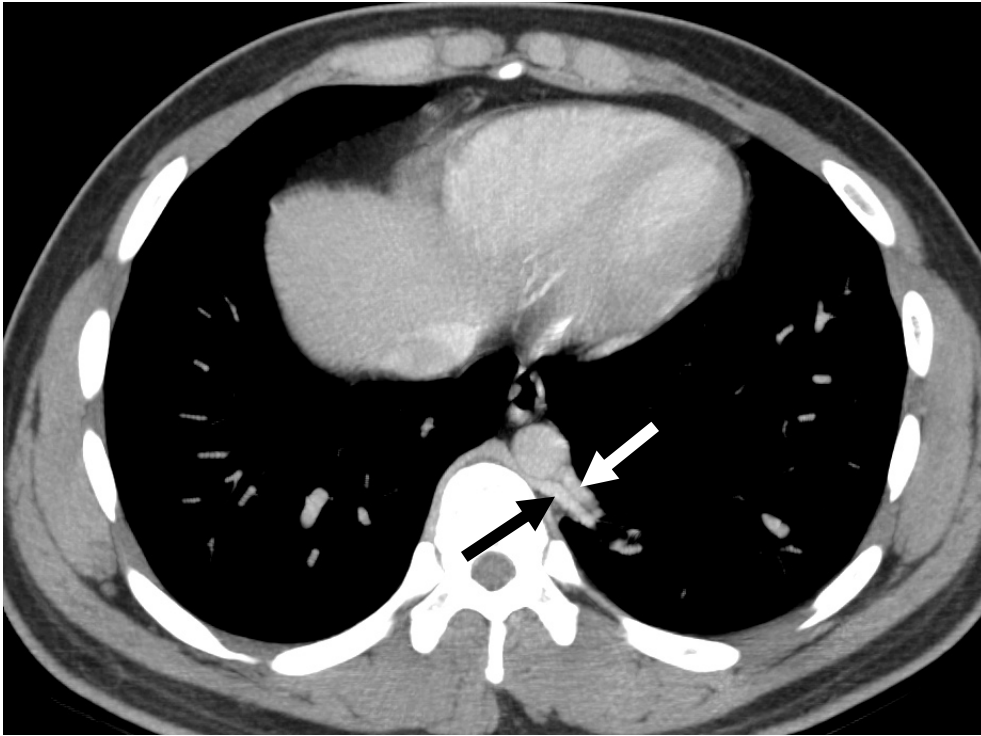

Supplement: image-ruan-2-at.pdf [file image-ruan-2-at.pdf]
